# Supplementary material for: Elevated circulating levels of neutrophil extracellular traps after cardiopulmonary bypass surgery as risk factors of postoperative atrial fibrillation and mortality
Source: PubMed Central journal article supplement — J Thorac Dis. 2024 Jul 12;16(7):4319–28. doi: 10.21037/jtd-24-295 (PMC11320234; doi:10.21037/jtd-24-295), 2024-07-12
Supplement: jtd-16-07-4319-dss.pdf [file jtd-16-07-4319-dss.pdf]

## Data Sharing Statement

|                     |                                                                                                                                                     |                                                                                                                                 |
|---------------------|-----------------------------------------------------------------------------------------------------------------------------------------------------|---------------------------------------------------------------------------------------------------------------------------------|
| <b>Article Info</b> | <a href="https://dx.doi.org/10.21037/jtd-24-295">https://dx.doi.org/10.21037/jtd-24-295</a>                                                         |                                                                                                                                 |
| <b>Item</b>         | <b>Question</b>                                                                                                                                     | <b>Authors' Response<br/>(place "-" if not applicable)</b>                                                                      |
| 1                   | Would you like to share data collected for your study to others?                                                                                    | Yes.                                                                                                                            |
| 2                   | If not, would you like to share the reason for your decision?                                                                                       | -                                                                                                                               |
| 3                   | What data in particular will be shared?                                                                                                             | The demographic data, including age and sex, and laboratory data in particular will be shared.                                  |
| 4                   | Any other documents will be shared? Such as study protocol, statistical analysis plan, informed consent form, clinical study report, analytic code. | Informed consent form will also be shared if requested.                                                                         |
| 5                   | When will data availability begin?                                                                                                                  | From the publication date.                                                                                                      |
| 6                   | When will data availability end?                                                                                                                    | Two years within the publication date.                                                                                          |
| 7                   | To whom will you share the data?                                                                                                                    | Thoracic surgeon, cardiologist, or laboratory medicine doctor interested in NETs research.                                      |
| 8                   | For what type of analysis or purpose?                                                                                                               | For analysis to evaluate the prognostic value of NETs or contact system markers in patients who underwent thoracic surgery.     |
| 9                   | How or where can the data/documents be obtained?                                                                                                    | Emails could be sent to the address below to obtain the shared data: <a href="mailto:lukekhk@snu.ac.kr">lukekhk@snu.ac.kr</a> . |
| 10                  | Any other restrictions?                                                                                                                             | We may balance the potential benefits and risks for each request and then provide the data that could be shared.                |
