# Supplementary material for: Elevated circulating levels of neutrophil extracellular traps after cardiopulmonary bypass surgery as risk factors of postoperative atrial fibrillation and mortality
Source: PubMed Central journal article supplement — J Thorac Dis. 2024 Jul 12;16(7):4319–28. doi: 10.21037/jtd-24-295 (PMC11320234; doi:10.21037/jtd-24-295), 2024-07-12
Supplement: jtd-16-07-4319-supplementary.pdf [file jtd-16-07-4319-supplementary.pdf]

**Table S1** Increase rate of total patients' circulating markers measured at T0 (before surgery)

| Markers                     | Reference range | Increase rates (%) |               |
|-----------------------------|-----------------|--------------------|---------------|
|                             |                 | Non-increased      | Increased     |
| Histone DNA complex (ng/mL) | 12.00–239.00    | 92/97 (94.85)      | 5/97 (5.15)   |
| Cell free dsDNA (ng/mL)     | 63.81–95.86     | 78/97 (80.41)      | 19/97 (19.59) |
| Neutrophil elastase (ng/mL) | 10.51–264.57    | 97/97 (100.00)     | 0/97 (0.00)   |
| Prekallikrein (ng/mL)       | 0.00–14.19      | 65/97 (67.01)      | 32/97 (32.99) |
| HMWK (ng/mL)                | 1.03–7.06       | 52/97 (53.61)      | 45/97 (46.39) |
| FXIIa (U/l)                 | 15.94–36.94     | 67/97 (69.07)      | 30/97 (30.93) |

The increase rates represent the percentage of total patients who showed increased circulating levels of the neutrophil extracellular traps and contact system measured before surgery (T0) in terms of reference range. Data is shown as number with percentile. dsDNA, double stranded DNA; HMWK, high molecular weight kininogen; FXIIa, activated factor XII.
